1 Elevation drives activity of soil bacteria, but not of bacterial viruses

2

3 D. Merges<sup>1,2</sup>, Alexandra Schmidt<sup>3</sup>, Imke Schmitt<sup>1,2,4</sup>, Eike Lena Neuschulz<sup>1</sup>,

4 Francesco Dal Grande<sup>1,2</sup>, Miklós Bálint<sup>1,5</sup>

5 <sup>1</sup> Senckenberg Biodiversity and Climate Research Centre, Frankfurt am Main, DE

6 <sup>2</sup> LOEWE Centre for Translational Biodiversity Genomics (LOEWE-TBG), Frankfurt am Main,

7 DE

8 <sup>3</sup> Department of Biology, Limnological Institute, University Konstanz, Konstanz, DE

9 <sup>4</sup> Department of Biological Sciences, Institute of Ecology, Evolution and Diversity, Goethe

10 University Frankfurt, Frankfurt am Main, DE

11 <sup>5</sup> Justus Liebig University Giessen, Giessen, DE

12

13 Corresponding authors:

14 Dominik Merges

15 Senckenberg Biodiversity and Climate Research Centre Frankfurt

16 Senckenberganlage 25

17 60325 Frankfurt am Main, Germany

18 dominik.merges@senckenberg.de

19

20 Phone: +49 69 7542-1856

21

22

23

24

25 **Running title:** Bacteria and phage activity across elevation

26 **Keywords:** altitudinal gradient, bacteriophage, *Caudovirales*, ecosystem functioning,

27 environmental change, metatranscriptomics, microbial interactions, predator-prey dynamics

28 **Abstract**

29           Soil microbial diversity affects ecosystem functioning and global  
30 biogeochemical cycles. Soil bacterial communities catalyze a diversity of  
31 biogeochemical reactions and have thus sparked considerable scientific interest. One  
32 driver of bacterial community dynamics in natural ecosystems has so far been largely  
33 neglected: the predator-prey interactions between bacterial viruses (bacteriophages)  
34 and bacteria. To generate ground level knowledge on environmental drivers of these  
35 particular predator-prey dynamics we propose an activity-based ecological framework  
36 to simultaneously capture community dynamics of bacteria and bacteriophages in  
37 soils. An ecological framework and specifically the analyses of community dynamics  
38 across latitudinal and altitudinal gradients have been widely used in ecology to  
39 understand community-wide responses of innumerable taxa to environmental  
40 change, in particular to climate. Here, we tested the hypothesis that the activity of  
41 bacteria and bacteriophages co-decline across an elevational gradient. We used  
42 metatranscriptomics to investigate bacterial and bacteriophage activity patterns at 5  
43 sites across 400 elevational meters in the Swiss Alps in 2015 and 2017. We found  
44 that metabolic activity (transcription levels) of bacteria declined significantly with  
45 increasing elevation, but activity of bacteriophages did not. We showed that  
46 bacteriophages are consistently active in soil along the entire gradient.  
47 Bacteriophage activity pattern, however, is divergent from that of their putative  
48 bacterial prey. Future efforts will be necessary to link the environment-activity  
49 relationship to predator-prey dynamics, to understand the magnitude of viral  
50 contributions to mobilize bacterial cell carbon when infection causes bacterial cell  
51 death, a process that may represent an overlooked component of soil  
52 biogeochemical cycles.

53

## 54 **Introduction**

55 Soil microbiomes are key for ecosystem functioning and play pivotal roles in global  
56 biogeochemical cycles (i.e., C and N cycling) (Braga et al., 2020; Pratama & van  
57 Elsas, 2018). The soil microbiome harbors groups of highly diverse organisms, such  
58 as bacteria, archaea, fungi and protozoa, including viruses that infect them (Kimura  
59 et al., 2008; Pratama & van Elsas, 2018). Bacteria and archaea catalyze a diversity  
60 of biogeochemical reactions, many of which are climate relevant (Hallin & Bodelier,  
61 2020; Monteux et al., 2020). Therefore, bacterial and archaeal functional assessment  
62 has sparked considerable interest (Hallin & Bodelier, 2020; Kimura et al., 2008;  
63 Pratama & van Elsas, 2018). Soil bacteria are increasingly considered in soil studies,  
64 but their respective viruses are readily neglected, resulting in a lack of understanding  
65 of how the interaction of bacteria with their viruses influences soil functioning  
66 (Ashelford et al., 2003; Kimura et al., 2008; Marsh & Wellington, 1994; Pratama &  
67 van Elsas, 2018). Viruses may impact soil communities by a) controlling  
68 microorganismal population dynamics as predators (Breitbart et al., 2018; Morella et  
69 al., 2018), and b) providing genes and functions, which may alter ecosystem  
70 properties, e.g. carbon degradation (Emerson et al., 2018; Pratama & van Elsas,  
71 2018; Trubl et al., 2018).

72 Bacteriophages, or short 'phages', are viruses that prey on bacteria (Hoffmann  
73 et al., 2007). From the point of view of trophic interactions, the relationship between  
74 bacteria and their viruses can be regarded as that of a prey and its predator (Chao et  
75 al., 1977; Weinbauer, 2004; Weitz & Dushoff, 2008). The interaction is initiated during  
76 a random encounter of the bacterium and a phage with its adsorption to specific  
77 receptor sites on the bacterial cell (Chao et al., 1977). Subsequently, the genome of  
78 the phage is injected into the bacterium (Chao et al., 1977). From this stage on,

79 phages can be classified as either virulent or temperate (Weitz & Dushoff, 2008).  
80 Virulent phages reproduce within the bacterial cell, kill their hosts and release an  
81 array of infective phage particles without undergoing an extended intracellular phase,  
82 whereas temperate phages can incorporate their genome into that of the host and  
83 remain dormant (Chao et al., 1977; Weinbauer, 2004; Weitz & Dushoff, 2008).  
84 Viruses may affect carbon cycling and carbon degradation in soil, 1) by mobilizing  
85 bacterial cell carbon when viral infection causes bacterial cell death and 2) by  
86 degrading plant-derived polymers into monosaccharides and oligosaccharides –  
87 which, in turn, can be metabolized by microbes resulting in CH<sub>4</sub> and CO<sub>2</sub> emissions –  
88 via glycoside hydrolases (Emerson et al. 2018). The full extent of bacteria-phage  
89 interactions across different environments, including soil, is poorly understood (Braga  
90 et al., 2020; Emerson et al., 2018; Roux et al., 2021; Starr et al., 2019).

91         The main factor limiting phage occurrence is the presence of bacterial hosts  
92 (Olszak et al., 2017; Weitz & Dushoff, 2008). Thus, all ecosystems with metabolically  
93 active bacteria are expected to have abundant and diverse phage populations  
94 (Marsh & Wellington, 1994). Accordingly, previous studies using metatranscriptomics  
95 found active phage communities when bacteria were active in soils (Emerson et al.,  
96 2018; Starr et al., 2019).

97         The integration of an ecological framework, such as activity analyses across  
98 gradients, into bacteria-virus interaction studies can address questions which have  
99 been mostly neglected in virology, but are key to advance our understanding on the  
100 ecosystem consequences of predator-prey dynamics (Sommers et al., 2021).  
101 Numerous previously published articles reported changes in bacterial metabolic  
102 activity across latitudinal and elevational gradients (Chase et al., 2021; Margesin et  
103 al., 2009; Ren et al., 2021; Rivkina et al., 2000; Schinner, 1982). Across these

104 gradients, the metabolic activity of bacteria has been linked to climatic factors, such  
105 as mean annual temperature, precipitation as well as soil properties (bulk density,  
106 ammonium nitrogen, and total phosphorus) (Margesin et al., 2009; Ren et al., 2021;  
107 Rivkina et al., 2000; Schinner, 1982). Given these changes in bacterial metabolic  
108 activity, one would expect changes in phage activity, with a potential impact on  
109 bacterial populations (Marsh & Wellington, 1994). Thereby a replicated elevational  
110 gradient setup is highly suitable to generate ground level knowledge on these  
111 particular predator-prey interactions and to assess their community-wide responses  
112 to environmental change, in particular to climate. However, no study to date has  
113 investigated the activity of bacteria and their phage predators across an elevational  
114 gradient.

115         The aim of this study was to establish a baseline approach to simultaneously  
116 assess bacteria and bacteriophage activities and their drivers in soil. To understand  
117 community-wide responses to environmental change, in particular to climate, we  
118 utilize gradient analyses from an ecological framework (Sommers et al., 2021) to  
119 assess the population-wide activities of bacteria and phage communities across an  
120 elevational gradient in the European Alps. Elevational gradients allow the study of  
121 broad environmental conditions on a condensed geographic scale (Bergner et al.,  
122 2020; Neuschulz et al., 2018). Specifically, we employed a metatranscriptomic  
123 approach to assess how activities of soil bacteria and phages, with regard to the  
124 expressed metabolic pathways, respond to elevation. Assuming that phages require  
125 metabolically active hosts to support multiplication (Marsh & Wellington, 1994), we  
126 expected similar levels of activity in bacteria and phages in a given environment.  
127 Since bacterial metabolic activity is lower at higher altitudes (Margesin et al., 2009;

128 Ren et al., 2021; Schinner, 1982), we expected a co-decline of bacterial and phage  
129 activity with increasing elevation.

130

### 131 **Material/Methods**

132 *Study site & sampling* The study sites were located in the Central Alps in the eastern  
133 part of Switzerland in the Sertig valley (46°44'0.76"N, 9°51'3.5"E) near Davos  
134 (Merges et al., 2020; Neuschulz et al., 2018). For soil sampling of bacterial and  
135 phage communities, we sampled five elevational levels at 1850, 1900, 2000, 2100  
136 and 2250 m a.s.l (Table S1). We conducted two sampling rounds, one in May 2015  
137 and one in May 2017, resulting in a total of 10 soil samples (Table S1). Soil samples  
138 were taken with a 1 cm soil core sampler (Ehlert & Partner). For each soil sample, we  
139 took five 5-cm deep soil cores from a 15 × 15 cm<sup>2</sup> area that we pooled and  
140 homogenized in a Ziploc bag (Merges et al., 2018). 10 g of homogenized soil were  
141 immediately transferred into a 50 mL Falcon filled with RNA preservative (LifeGuard  
142 Soil Preservation Solution, QIAGEN). The preserved soil was frozen at -80°C when  
143 brought to the lab.

144 *Lab & bioinformatics* RNA was extracted with RNeasy PowerSoil Total RNA  
145 Kit (QIAGEN) and deeply sequenced to 8GB depth per sample at NOVOGEN. We  
146 received consistently high yields, with a total of 30 – 40 Mio. reads per sample (NCBI  
147 Bioproject ID XXXXX). Sequences were quality filtered and trimmed of adapters  
148 using TRIMMOMATIC (Bolger et al., 2014). We assessed the quality of reads with  
149 fastQC (<https://www.bioinformatics.babraham.ac.uk/projects/fastqc/>).

150 *Assembly of bacterial contigs:* Trimmed reads were assembled with TRINITY  
151 (Grabherr et al., 2013). Assembled contigs were taxonomically binned using the *last*  
152 *common ancestor* (LCA) algorithm of DIAMOND with the NCBI nr protein database  
153 and bacterial contigs were selected (Buchfink et al., 2014). Activity was assessed by

154 mapping back raw reads to individual taxa bins using SALMON/deseq2 (please see  
155 below). PROKKA was used for functional annotation (Seemann, 2014).

156 *Assembly of viral contigs:* Trimmed reads were assembled with  
157 rnaviralSPAdes (Lapidus & Korobeynikov, 2021; Nurk et al., 2017). Assembled  
158 contigs were screened for viral origin using VirSorter2 (Guo et al., 2021). Putative  
159 viral contigs were further quality controlled using CheckV (Nayfach et al., 2020).  
160 Passing contigs were taxonomically binned using the *last common ancestor* (LCA)  
161 algorithm of DIAMOND with the NCBI nr protein database (Buchfink et al., 2014). The  
162 produced dataset of viral contigs was subsetted to taxa exclusively associated with  
163 bacteria (i.e., bacteriophages). We used PROKKA for functional annotation  
164 (Seemann, 2014).

165 *Activity/transcript expression analyses:* For transcript abundance quantification  
166 (i.e. estimated counts per transcript) we used SALMON v0.14.1 with the --gcBias flag  
167 (Patro et al., 2017). The --gcBias flag integrates the estimation of a correction factor  
168 for systematic biases frequently present in RNA-seq data (Patro et al., 2017). The  
169 tximport package (Soneson et al., 2016) was used to import the quantified data from  
170 SALMON into R v3.6.1 (R Core Team, 2019). For differential expression analysis, a  
171 DESeqDataSet was constructed from the tximport object with the  
172 DESeqDataSetFromTximport function from the DESeq2 package (Love et al., 2014).  
173 We tested differences between the two sampling years using the Likelihood ratio test  
174 (LRT) with Benjamini–Hochberg false discovery rate control as implemented in  
175 DESeq2 (Love et al., 2014). Transcripts were normalized using the “Relative Log  
176 Expression” normalization (RLE) (Love et al., 2014). We found no significantly  
177 different expressed transcripts between the two years (Benjamini-Hochberg adjusted  
178 p-values > 0.05). The plotPCA function was used to visualize similarities between  
179 temporal replicates (Figure S1). Due to absence of temporal effects on transcript

180 expression, we tested the effect of elevation on the normalized read counts using  
181 generalized linear models (GLM) with negative binomial distribution (Venables &  
182 Ripley, 2002). To account for genome size differences, when comparing bacterial  
183 and phage activity, all available genome size information on taxa were retrieved from  
184 NCBI refseq database (n=5507) using the R/Bioconductor package biomaRt (Durinck  
185 et al., 2009). Analysis was repeated with a subset, where genome size information  
186 was available, by additionally normalizing read counts for genome size (i.e. dividing  
187 normalized read counts by the mean genome size of the respective taxa; Table S10  
188 & S11).

189

## 190 **Results:**

### 191 *Taxonomic Diversity*

192 *Diversity of bacterial taxa* The retrieved 170.265 bacterial contigs spanned a diversity  
193 of 37 phyla encompassing 428 families (Figure 1). The most expressed transcripts  
194 belonged to the phyla *Proteobacteria*, *Actinobacteria*, *Firmicutes*, *Acidobacteria*, and  
195 *Bacteroidetes* (Table S2 & Table S5-S9).

196 *Diversity of phage taxa* We received 216 bacteriophage contigs belonging to 3  
197 orders across 9 distinct families (Fig. 2). Of these, the double stranded DNA (dsDNA)  
198 bacterial virus families of *Autographiviridae*, *Demereciviridae*, *Herelleviridae*,  
199 *Myoviridae*, *Podoviridae*, *Siphoviridae* of the order *Caudovirales* showed the highest  
200 transcriptional activity (Table S3 & S4). One further viral family with DNA genomes  
201 (single stranded DNA) was detected, belonging to the family of *Microviridae* (Order  
202 *Petitvirales*), as well as one family of single stranded RNA viruses (ssRNA viruses:  
203 *Fiersviridae*, formally *Leviviridae*, Order *Norzivirales*, Table S3 & S4).

204 *Bacterial and viral activity across years and elevation* Overall activity was not  
205 significantly different between the years 2015 and 2017 ( $p > 0.05$ ; Fig. S1). Bacterial



206 activity significantly declined with increasing elevation ( $p < 0.01$ , Fig. 3), whereas  
207 bacteriophage activity was not significantly affected by elevation ( $p > 0.05$ , Fig. 3).  
208 The patterns were robust when normalizing the transcriptional activity by mean  
209 genome size (Fig. S4).

210 *Metabolic pathways* Annotation of expressed genes revealed a broad diversity  
211 of metabolic pathways across the bacterial taxa (Fig. S2 & S3). The majority of  
212 annotated genes were directly related to metabolic pathways, tRNA biosynthesis and  
213 the biosynthesis of secondary metabolites (Fig. S2 & S3). For viral taxa, no functional  
214 information could be retrieved. The proportional activity of metabolic pathways  
215 remained constant across the elevational gradient (Fig. S3).

216

## 217 **Discussion**

218 So far, the effect of phages on soil bacterial communities has been mostly neglected  
219 (Braga et al., 2020) and only recently has been receiving interest enabled by the  
220 advance of high throughput approaches (Braga et al., 2020; Emerson et al., 2018;  
221 Trubl et al., 2018). In the present study, we applied a metatranscriptomics approach,  
222 where we identified highly diverse bacterial and phage communities in soils across  
223 an elevational gradient. In accordance with our hypothesis, bacterial metabolic  
224 activities strongly declined with increasing elevation. In contrast, we found that  
225 bacteriophages are consistently active in soil along the entire gradient.

226 We found the taxa *Proteobacteria*, *Actinobacteria*, *Firmicutes*, *Acidobacteria*,  
227 and *Bacteroidetes* to be the most metabolically active members of the soil bacterial  
228 communities (Fig. 1). Their activity strongly declined with increasing elevation (Fig.  
229 3a). Similarly, Margesin et al. (2009) could show a decline in the relative amount  
230 these taxa as well as a decrease in activity in a gradient in Austrian Central Alps,  
231 based on measurements of soil dehydrogenase activity, with increasing elevation in

232 alpine soils. Ren et al. (2021) reported comparable bacterial community composition  
233 and a decreasing abundance with increasing elevation, based on 16S rRNA  
234 amplicon sequencing of soils from the Qinling Mountains in central China. Both  
235 studies could link the decline in activity and abundance to lower temperatures at high  
236 elevational sites (Margesin et al., 2009; Ren et al., 2021). We suspect that  
237 temperature also underlies the pattern observed by us for bacterial transcriptional  
238 activity. This may be confirmed with a follow-up study with increased sample sizes,  
239 combined with fine-scale temperature measurements.

240 We detected ssRNA viruses (Family: *Leviviridae*) only in one single elevation  
241 (Fig. 2, Elevation 1900 m a.s.l., brown bar). So far, RNA phages of the *Leviviridae*  
242 family were identified in a metatranscriptomics study in soils from California (Starr et  
243 al., 2019). The authors reported a generally large diversity of *Leviviridae*. However, in  
244 accordance with our findings, a heterogeneous distribution across samples and  
245 replicates (Starr et al., 2019).

246 We found dsDNA bacteriophages of the order *Caudovirales* to be the most  
247 dominant members of the active soil viral communities. In accordance with our study,  
248 dsDNA bacteriophages of the order *Caudovirales* are consistently reported as the  
249 most dominant viruses present in soil (Adriaenssens et al., 2017; Emerson et al.,  
250 2018; Williamson et al., 2005). (Williamson et al., 2005) showed that the majority of  
251 soil viruses in Delaware soil were bacteriophages belonging to the *Caudovirales* by  
252 combing direct counting of virus-like particles (VLPs) with morphological data  
253 gathered using TEM. Additional supporting evidence came from recent metagenomic  
254 approaches, which found members of the *Caudovirales* (specifically the families:  
255 *Myoviridae*, *Podoviridae* and *Siphoviridae*) made up more than 80% of the relative  
256 abundance at all sites in Antarctic soil (Adriaenssens et al., 2017). These are the  
257 families which also showed high activity in our samples (Fig. 2). A similar dominance

258 of members of the *Caudovirales* order and its families (95% of assigned sequences)  
259 was found in soils of a permafrost thaw gradient in northern Sweden (Emerson et al.,  
260 2018). Our RNA-based approach now adds evidence that the *Caudovirales* are not  
261 only the most abundant, but also the most metabolically active members of the soil  
262 virome, contributing 97 % of the detected viral transcription activity in our dataset.

263 Interestingly, the activity of soil bacteria and their putative phages did not co-  
264 decline across the elevational gradient. While there is little knowledge on co-activity  
265 patterns, previous studies reported correlation between bacterial and phage  
266 abundance in marine and soil environments (Weinbauer, 2004; Williamson et al.,  
267 2017; Wommack & Colwell, 2000). For example, a meta-analysis of soil viral  
268 datasets, revealed viral abundance to be significantly positively correlated with  
269 bacterial abundance (Williamson et al., 2017). Such an abundance correlation might  
270 be explained by the dependency of phage replication on host availability, where a  
271 high bacterial host availability is expected to increase phage abundances (Williamson  
272 et al., 2017). In our study, moving towards an activity-based framework to capture  
273 dynamics of bacteria and phage communities, we found distinct patterns between the  
274 two groups. Here, complex predator-prey dynamics, such as negative feedback  
275 loops, host switching to maintain similar levels of activity across the gradient, or an  
276 increased virulence withing the declining population of the hosts might be possible  
277 explanations of the divergent pattern between bacteria and phage activity, in  
278 comparison to abundance-based studies (Breitbart et al., 2018; Trubl et al., 2018).  
279 Disentangling these mechanisms will be possible to be tested with increased sample  
280 sizes and fine-scale temporal replication, accounting for microsite conditions.

281 Considering both bacterial and viral co-occurrence patterns across elevational  
282 gradients could provide a template for answering questions regarding the diversity,  
283 distribution, dynamics, and interactions of viruses with their hosts and their abiotic

284 environment (Sommers et al., 2021). The integration of an ecological framework in  
285 viral metagenomics and -transcriptomics could broadly expand our knowledge on  
286 ecosystem-level effects of viruses (Roux et al., 2021; Sommers et al., 2021).

287

## 288 Conclusion

289 Our study provides a first glimpse on the activity of bacteria and their viruses across  
290 an elevational gradient, by assessing bacterial and viral activities with a  
291 metatranscriptomics approach. It remains unclear what the consequences are of the  
292 proportionally increased activity of viruses compared to the activity of their bacterial  
293 hosts at high elevations, and how this influences ecosystem functioning provided by  
294 bacteria, such as carbon degradation. One emerging hypothesis to be tested from  
295 our study is if bacteria produce proportionally more phages at higher elevations,  
296 because phages are more successful in replication than bacteria under harsh  
297 environmental conditions (Heilmann et al., 2010; Vos et al., 2009). This would mean  
298 that bacterial activity is increasingly turned into phage production at environmentally  
299 harsher higher elevations. To test this hypothesis, in the future metatranscriptomics  
300 could be combined with bacterial and viral abundance estimations, and with fine-  
301 scale temperature and soil property measurements. Phage exclusion experiments in  
302 the field might also contribute to gain a mechanistic understanding of the interaction  
303 between bacteria and their viruses, as well as the importance of viral activity for  
304 ecosystem processes.

305

306

307 **Data Accessibility**

308 Raw sequence reads and assembled contigs will be deposited in the Sequence Read  
309 Archive under the BioProject XXXXXX

310

311 **Acknowledgments**

312 We thank Damian Baranski for help with laboratory procedures, and Christoph Sinai  
313 and Tilman Schell (Frankfurt am Main) for support with bioinformatics.

314

315

316 **Authors' contributions**

317 D.M., and M.B. conceived the ideas; D.M. and ELN collected the data, D.M.  
318 performed laboratory work; D.M. and AS analyzed data, F.D.G. provided analytical  
319 guidance; D.M. and M.B wrote the manuscript. All authors contributed to the various  
320 drafts and gave final approval for publication.

321

322

323

324

325

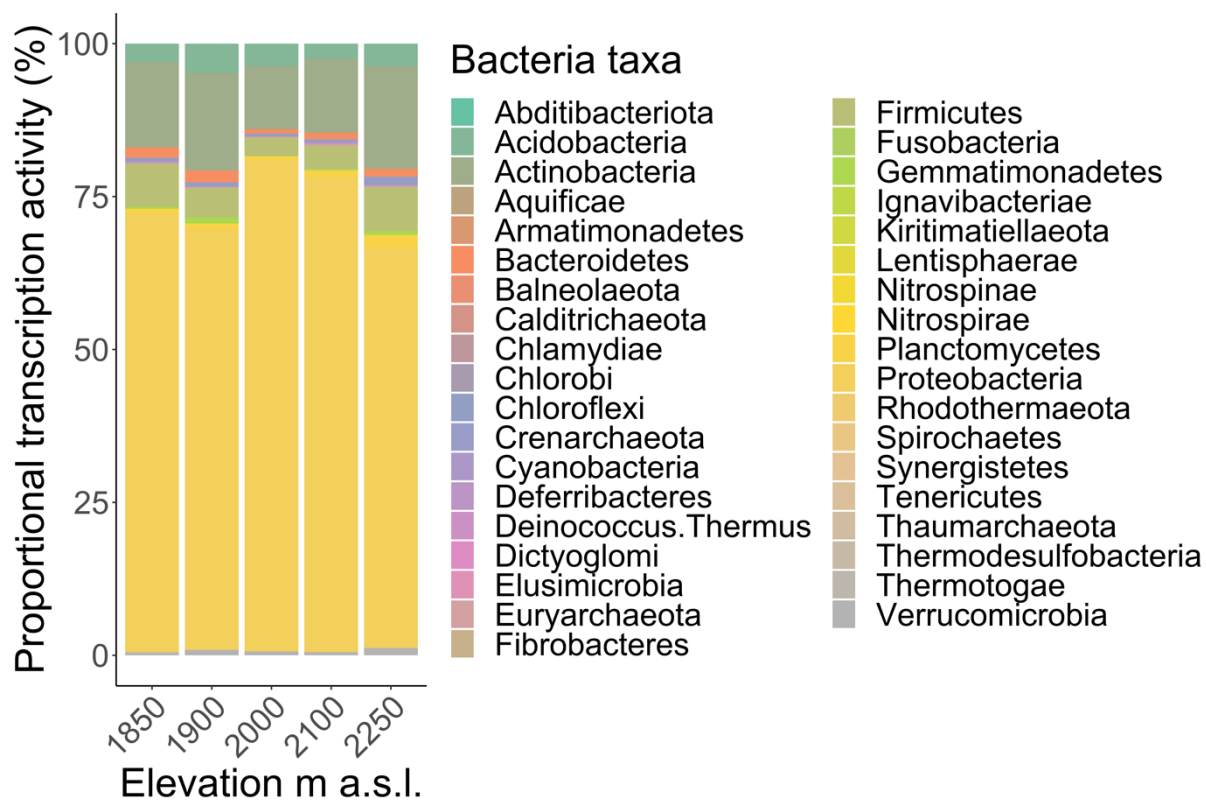

326

327 *Figure 1: Proportional transcription activity of soil bacteria across the elevational*  
328 *gradient.*

329

330

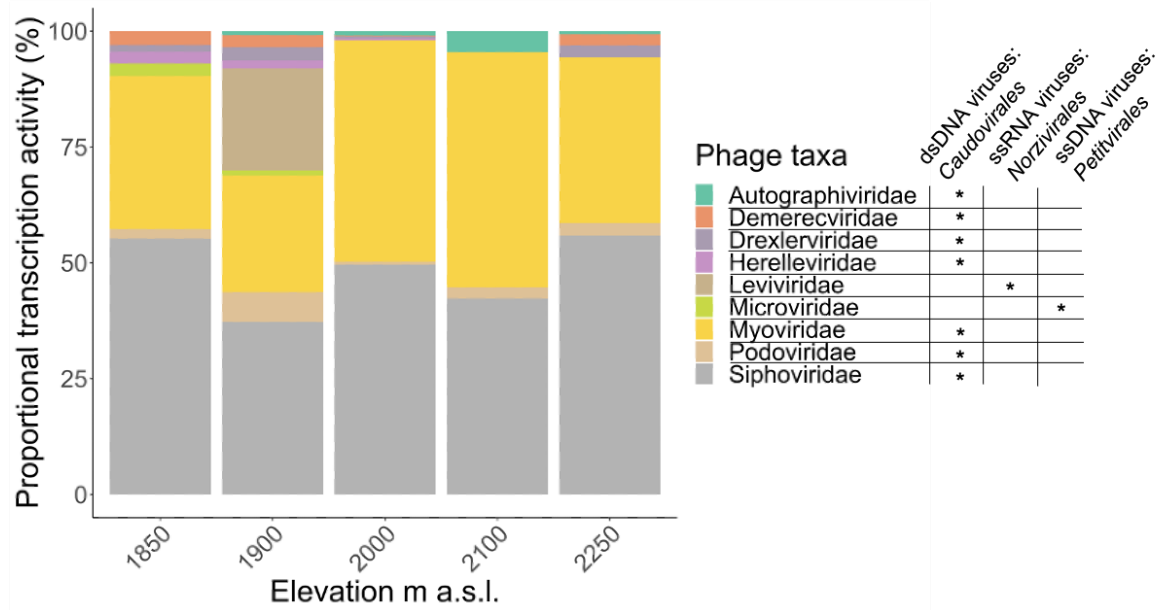

331

332 *Figure 2: Proportional transcription activity of soil bacteriophages across the*

333 *elevational gradient.*

334

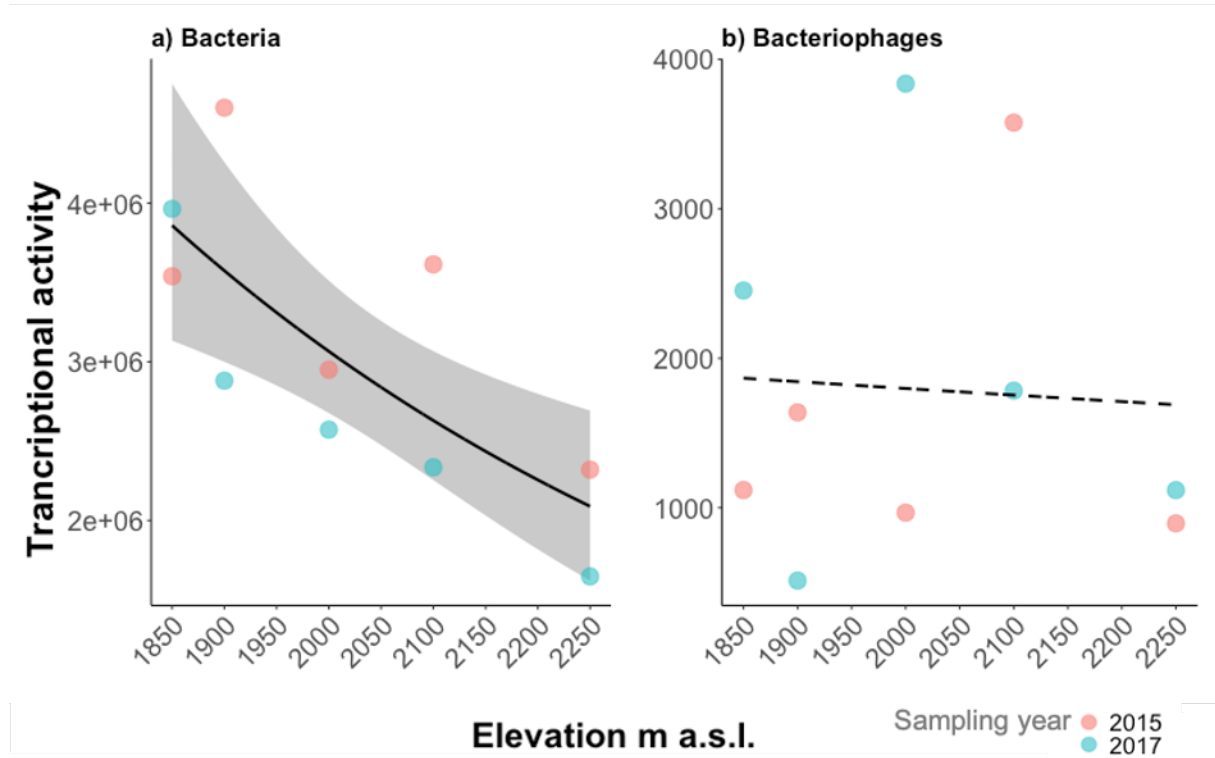

335

336 *Figure 3: Soil bacterial (a) and phage (b) transcriptional activity across the elevational*

337 *gradient. Bacterial activity (a) significantly declined with increasing elevation,*

338 *whereas phage activity (b) showed no response to elevation.*

339



340 **References**

- 341 Adriaenssens, E. M., Kramer, R., van Goethem, M. W., Makhalanyane, T. P., Hogg,  
342 I., & Cowan, D. A. (2017). Environmental drivers of viral community composition  
343 in Antarctic soils identified by viromics. *Microbiome*, 5(1), 1–14.  
344 <https://doi.org/10.1186/s40168-017-0301-7>
- 345 Ashelford, K. E., Day, M. J., & Fry, J. C. (2003). Elevated abundance of  
346 bacteriophage infecting bacteria in soil. *Applied and Environmental Microbiology*,  
347 69(1), 285–289. <https://doi.org/10.1128/AEM.69.1.285-289.2003>
- 348 Bergner, L. M., Orton, R. J., Benavides, J. A., Becker, D. J., Tello, C., Biek, R., &  
349 Streicker, D. G. (2020). Demographic and environmental drivers of metagenomic  
350 viral diversity in vampire bats. *Molecular Ecology*, 29(1), 26–39.  
351 <https://doi.org/10.1111/mec.15250>
- 352 Bolger, A. M., Lohse, M., & Usadel, B. (2014). Trimmomatic: A flexible trimmer for  
353 Illumina sequence data. *Bioinformatics*, 30(15), 2114–2120.  
354 <https://doi.org/10.1093/bioinformatics/btu170>
- 355 Braga, L. P. P., Spor, A., Kot, W., Breuil, M. C., Hansen, L. H., Setubal, J. C., &  
356 Philippot, L. (2020). Impact of phages on soil bacterial communities and nitrogen  
357 availability under different assembly scenarios. *Microbiome*, 8(1), 1–14.  
358 <https://doi.org/10.1186/s40168-020-00822-z>
- 359 Breitbart, M., Bonnain, C., Malki, K., & Sawaya, N. A. (2018). Phage puppet masters  
360 of the marine microbial realm. *Nature Microbiology*, 3(7), 754–766.  
361 <https://doi.org/10.1038/s41564-018-0166-y>
- 362 Buchfink, B., Xie, C., & Huson, D. H. (2014). Fast and sensitive protein alignment  
363 using DIAMOND. *Nature Methods*, 12(1), 59–60.  
364 <https://doi.org/10.1038/nmeth.3176>
- 365 Chao, L., Levin, B. R., & Stewart, F. M. (1977). A Complex Community in a Simple

- 366 Habitat: An Experimental Study with Bacteria and Phage. *Ecology*, 58(2), 369–  
367 378.
- 368 Chase, A. B., Weihe, C., & Martiny, J. B. H. (2021). Adaptive differentiation and rapid  
369 evolution of a soil bacterium along a climate gradient. *Proceedings of the*  
370 *National Academy of Sciences*, 118(18).  
371 <https://doi.org/10.1073/pnas.2101254118>
- 372 Durinck, S., Spellman, P. T., Birney, E., & Huber, W. (2009). Mapping Identifiers for  
373 the Integration of Genomic Datasets with the R/Bioconductor package biomaRt.  
374 *Nat Protoc.*, 4(8), 1184–1191. <https://doi.org/10.1038/nprot.2009.97>. Mapping
- 375 Emerson, J. B., Roux, S., Brum, J. R., Bolduc, B., Woodcroft, B. J., Jang, H. Bin,  
376 Singleton, C. M., Solden, L. M., Naas, A. E., Boyd, J. A., Hodgkins, S. B.,  
377 Wilson, R. M., Trubl, G., Li, C., Froking, S., Pope, P. B., Wrighton, K. C., Crill, P.  
378 M., Chanton, J. P., ... Sullivan, M. B. (2018). Host-linked soil viral ecology along  
379 a permafrost thaw gradient. *Nature Microbiology*, 3(8), 870–880.  
380 <https://doi.org/10.1038/s41564-018-0190-y>
- 381 Grabherr, M. G. , Brian J. Haas, Moran Yassour Joshua Z. Levin, Dawn A.  
382 Thompson, Ido Amit, Xian Adiconis, Lin Fan, Raktima Raychowdhury, Qiandong  
383 Zeng, Zehua Chen, Evan Mauceli, Nir Hacohen, Andreas Gnirke, Nicholas  
384 Rhind, Federica di Palma, Bruce W., N., & Friedman, and A. R. (2013). Trinity:  
385 reconstructing a full-length transcriptome without a genome from RNA-Seq data.  
386 *Nature Biotechnology*, 29(7), 644–652. <https://doi.org/10.1038/nbt.1883>. Trinity
- 387 Guo, J., Bolduc, B., Zayed, A. A., Varsani, A., Dominguez-Huerta, G., Delmont, T. O.,  
388 Pratama, A. A., Gazitúa, M. C., Vik, D., Sullivan, M. B., & Roux, S. (2021).  
389 VirSorter2: a multi-classifier, expert-guided approach to detect diverse DNA and  
390 RNA viruses. *Microbiome*, 9(1), 1–13. [https://doi.org/10.1186/s40168-020-](https://doi.org/10.1186/s40168-020-00990-y)  
391 00990-y

- 392 Hallin, S., & Bodelier, P. L. E. (2020). Grand Challenges in Terrestrial Microbiology:  
393 Moving on From a Decade of Progress in Microbial Biogeochemistry. *Frontiers in*  
394 *Microbiology*, 11(May), 1–5. <https://doi.org/10.3389/fmicb.2020.00981>
- 395 Heilmann, S., Sneppen, K., & Krishna, S. (2010). Sustainability of Virulence in a  
396 Phage-Bacterial Ecosystem. *Journal of Virology*, 84(6), 3016–3022.  
397 <https://doi.org/10.1128/jvi.02326-09>
- 398 Kimura, M., Jia, Z. J., Nakayama, N., & Asakawa, S. (2008). Ecology of viruses in  
399 soils: Past, present and future perspectives. *Soil Science and Plant Nutrition*,  
400 54(1), 1–32. <https://doi.org/10.1111/j.1747-0765.2007.00197.x>
- 401 Lapidus, A. L., & Korobeynikov, A. I. (2021). Metagenomic Data Assembly – The  
402 Way of Decoding Unknown Microorganisms. *Frontiers in Microbiology*,  
403 12(March). <https://doi.org/10.3389/fmicb.2021.613791>
- 404 Love, M. I., Huber, W., & Anders, S. (2014). Moderated estimation of fold change and  
405 dispersion for RNA-seq data with DESeq2. *Genome Biology*, 15(12), 1–21.  
406 <https://doi.org/10.1186/s13059-014-0550-8>
- 407 Margesin, R., Jud, M., Tscherko, D., & Schinner, F. (2009). Microbial communities  
408 and activities in alpine and subalpine soils. *FEMS Microbiology Ecology*, 67(2),  
409 208–218. <https://doi.org/10.1111/j.1574-6941.2008.00620.x>
- 410 Marsh, P., & Wellington, E. M. H. (1994). Phage-host interactions in soil. *FEMS*  
411 *Microbiology Ecology*, 15(1–2), 99–107. [https://doi.org/10.1111/j.1574-](https://doi.org/10.1111/j.1574-6941.1994.tb00234.x)  
412 [6941.1994.tb00234.x](https://doi.org/10.1111/j.1574-6941.1994.tb00234.x)
- 413 Merges, D., Bálint, M., Schmitt, I., Böhning-Gaese, K., & Neuschulz, E. L. (2018).  
414 Spatial patterns of pathogenic and mutualistic fungi across the elevational range  
415 of a host plant. *Journal of Ecology*, 106(4), 1545–1557.  
416 <https://doi.org/10.1111/1365-2745.12942>
- 417 Merges, D., Bálint, M., Schmitt, I., Manning, P., & Neuschulz, E. L. (2020). High

418 throughput sequencing combined with null model tests reveals specific plant-  
419 fungi associations linked to seedling establishment and survival. *Journal of*  
420 *Ecology*, 108(2), 574–585. <https://doi.org/10.1111/1365-2745.13291>

421 Monteux, S., Keuper, F., Fontaine, S., Gavazov, K., Hallin, S., Juhanson, J., Krab, E.  
422 J., Revaillet, S., Verbruggen, E., Walz, J., Weedon, J. T., & Dorrepaal, E. (2020).  
423 Carbon and nitrogen cycling in Yedoma permafrost controlled by microbial  
424 functional limitations. *Nature Geoscience*, 13(12), 794–798.  
425 <https://doi.org/10.1038/s41561-020-00662-4>

426 Morella, N. M., Gomez, A. L., Wang, G., Leung, M. S., & Koskella, B. (2018). The  
427 impact of bacteriophages on phyllosphere bacterial abundance and composition.  
428 In *Molecular Ecology* (Vol. 27, Issue 8). <https://doi.org/10.1111/mec.14542>

429 Nayfach, S., Camargo, A. P., Eloë-Fadrosh, E., Roux, S., & Kyrpides, N. (2020).  
430 CheckV: assessing the quality of metagenome-assembled viral genomes.  
431 *BioRxiv*, 1–20. <https://doi.org/https://doi.org/10.1101/2020.05.06.081778>

432 Neuschulz, E. L., Merges, D., Bollmann, K., Gugerli, F., & Böhning-Gaese, K. (2018).  
433 Biotic interactions and seed deposition rather than abiotic factors determine  
434 recruitment at elevational range limits of an alpine tree. *Journal of Ecology*,  
435 106(3), 948–959. <https://doi.org/10.1111/1365-2745.12818>

436 Nurk, S., Meleshko, D., Korobeynikov, A., & Pevzner, P. A. (2017). MetaSPAdes: A  
437 new versatile metagenomic assembler. *Genome Research*, 27(5), 824–834.  
438 <https://doi.org/10.1101/gr.213959.116>

439 Olszak, T., Latka, A., Roszniowski, B., Valvano, M. A., & Drulis-Kawa, Z. (2017).  
440 Phage Life Cycles Behind Bacterial Biodiversity. *Current Medicinal Chemistry*,  
441 24(36), 3987–4001. <https://doi.org/10.2174/0929867324666170413100136>

442 Patro, R., Duggal, G., Love, M. I., Irizarry, R. A., & Kingsford, C. (2017). Salmon  
443 provides fast and bias-aware quantification of transcript expression. *Nature*

- 444 *Methods*, 14(4), 417–419. <https://doi.org/10.1038/nmeth.4197>
- 445 Pratama, A. A., & van Elsas, J. D. (2018). The ‘Neglected’ Soil Virome – Potential  
446 Role and Impact. *Trends in Microbiology*, 26(8), 649–662.  
447 <https://doi.org/10.1016/j.tim.2017.12.004>
- 448 Ren, C., Zhou, Z., Guo, Y., Yang, G., Zhao, F., Wei, G., Han, X., Feng, L., Feng, Y.,  
449 & Ren, G. (2021). Contrasting patterns of microbial community and enzyme  
450 activity between rhizosphere and bulk soil along an elevation gradient. *Catena*,  
451 196(September 2020), 104921. <https://doi.org/10.1016/j.catena.2020.104921>
- 452 Rivkina, E. M., Friedmann, E. I., McKay, C. P., & Gilichinsky, D. A. (2000). Metabolic  
453 activity of Permafrost Bacteria below the freezing point. *Applied and*  
454 *Environmental Microbiology*, 66(8), 3230–3233.  
455 <https://doi.org/10.1128/AEM.66.8.3230-3233.2000>
- 456 Roux, S., Páez-Espino, D., Chen, I. M. A., Palaniappan, K., Ratner, A., Chu, K.,  
457 Reddy, T., Nayfach, S., Schulz, F., Call, L., Neches, R. Y., Woyke, T., Ivanova,  
458 N. N., Elie-Fadrosh, E. A., & Kyrpides, N. C. (2021). IMG/VR v3: An integrated  
459 ecological and evolutionary framework for interrogating genomes of uncultivated  
460 viruses. *Nucleic Acids Research*, 49(D1), D764–D775.  
461 <https://doi.org/10.1093/nar/gkaa946>
- 462 Schinner, F. (1982). Soil microbial activities and litter decomposition related to  
463 altitude. *Plant and Soil*, 65(1), 87–94. <https://doi.org/10.1007/BF02376806>
- 464 Seemann, T. (2014). Prokka: Rapid prokaryotic genome annotation. *Bioinformatics*,  
465 30(14), 2068–2069. <https://doi.org/10.1093/bioinformatics/btu153>
- 466 Sommers, P., Chatterjee, A., Varsani, A., & Trubl, G. (2021). Integrating Viral  
467 Metagenomics into an Ecological Framework. *Annual Review of Virology*, 8,  
468 133–158. <https://doi.org/10.1146/annurev-virology-010421-053015>
- 469 Sonesson, C., Love, M. I., & Robinson, M. D. (2016). Differential analyses for RNA-

- 470 seq: Transcript-level estimates improve gene-level inferences. *F1000Research*,  
471 4, 1–19. <https://doi.org/10.12688/F1000RESEARCH.7563.2>
- 472 Starr, E. P., Nuccio, E. E., Pett-Ridge, J., Banfield, J. F., & Firestone, M. K. (2019).  
473 Metatranscriptomic reconstruction reveals RNA viruses with the potential to  
474 shape carbon cycling in soil. *Proceedings of the National Academy of Sciences*  
475 *of the United States of America*, 116(51), 25900–25908.  
476 <https://doi.org/10.1073/pnas.1908291116>
- 477 Team, R. C. (2019). R: A language and environment for statistical computing. *R*  
478 *Foundation for Statistical Computing*.
- 479 Trubl, G., Jang, H. Bin, Roux, S., Emerson, J. B., Solonenko, N., Vik, D. R., Solden,  
480 L., Ellenbogen, J., Runyon, A. T., Bolduc, B., Woodcroft, B. J., Saleska, S. R.,  
481 Tyson, G. W., Wrighton, K. C., Sullivan, M. B., & Rich, V. I. (2018). Soil viruses  
482 are underexplored players in ecosystem carbon processing. *BioRxiv*, 3(5), 1–21.  
483 <https://doi.org/10.1101/338103>
- 484 Venables, W. N., & Ripley, B. D. (2002). *Modern Applied Statistics with S* (4th ed.).  
485 Springer International Publishing.
- 486 Vos, M., Birkett, P. J., Birch, E., Griffiths, R. I., & Buckling, A. (2009). Local  
487 adaptation of bacteriophages to their bacterial hosts in soil. *Science*, 325(5942),  
488 833. <https://doi.org/10.1126/science.1174173>
- 489 Weinbauer, M. G. (2004). Ecology of prokaryotic viruses. *FEMS Microbiology*  
490 *Reviews*, 28(2), 127–181. <https://doi.org/10.1016/j.femsre.2003.08.001>
- 491 Weitz, J. S., & Dushoff, J. (2008). Alternative stable states in host - Phage dynamics.  
492 *Theoretical Ecology*, 1(1), 13–19. <https://doi.org/10.1007/s12080-007-0001-1>
- 493 Williamson, K. E., Fuhrmann, J. J., Wommack, K. E., & Radosevich, M. (2017). The  
494 Annual Review of Virology is online at [virology.annualreviews.org](http://virology.annualreviews.org). *Annu. Rev.*  
495 *Virol*, 4, 201–219. <https://doi.org/10.1146/annurev-virology->

- 496 Williamson, K. E., Radosevich, M., & Wommack, K. E. (2005). Abundance and  
497 diversity of viruses in six Delaware soils. *Applied and Environmental*  
498 *Microbiology*, 71(6), 3119–3125. [https://doi.org/10.1128/AEM.71.6.3119-](https://doi.org/10.1128/AEM.71.6.3119-3125.2005)  
499 3125.2005
- 500 Wommack, K. E., & Colwell, R. R. (2000). Virioplankton: Viruses in Aquatic  
501 Ecosystems. *Microbiology and Molecular Biology Reviews*, 64(1), 69–114.  
502 <https://doi.org/10.1128/mnbr.64.1.69-114.2000>
- 503
- 504
